# Supplementary material
Source: PubMed Central journal article supplement (PMC3474920)

## Supplementary figure 6.

**A**

250—  
150—  
100—  
75—

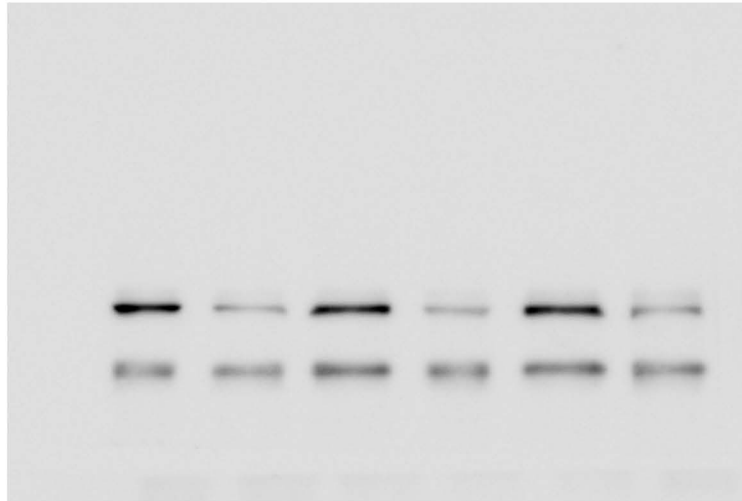

50—  
37—  
25—

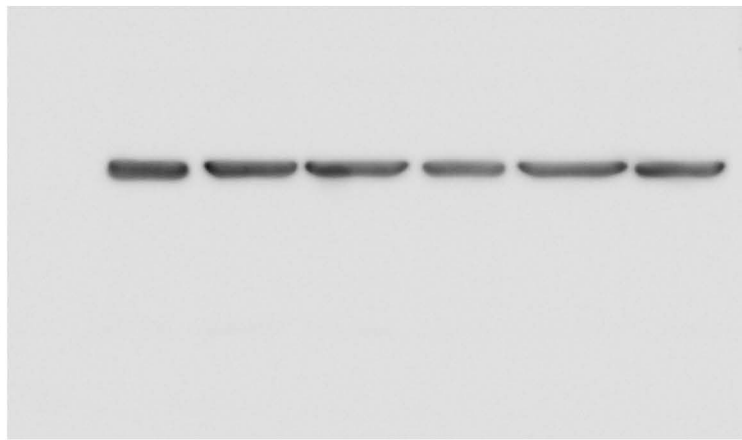

**C**

75—  
50—  
37—  
25—  
20—  
15—  
10—

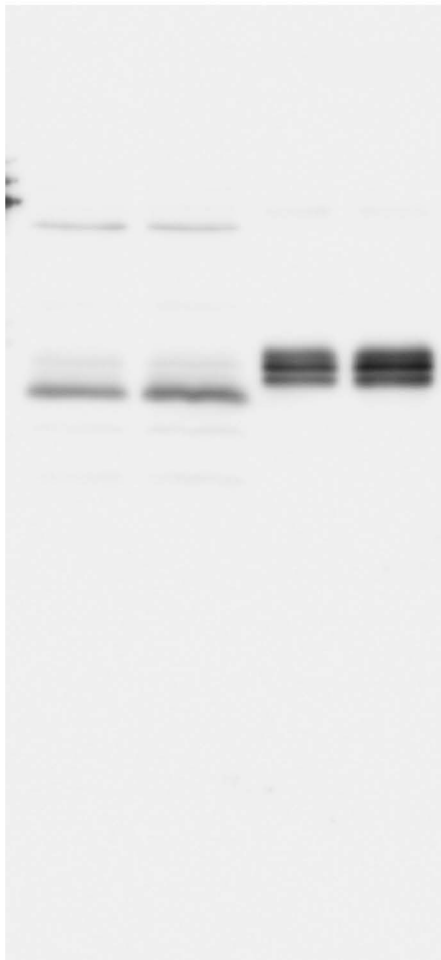

Supplement: emboj2012235s10.pdf [file emboj2012235s10.pdf]

**Figure 1.**

**A**

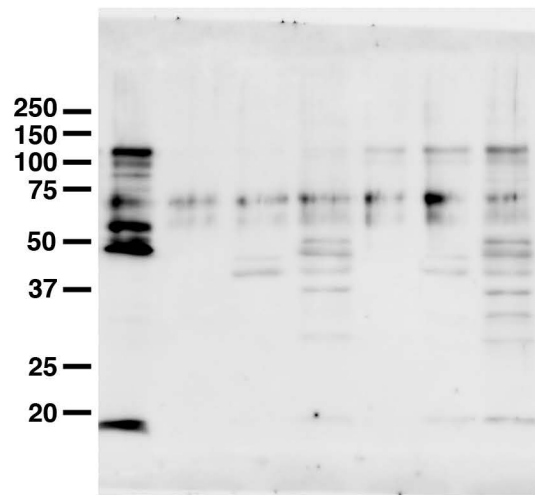

**B**

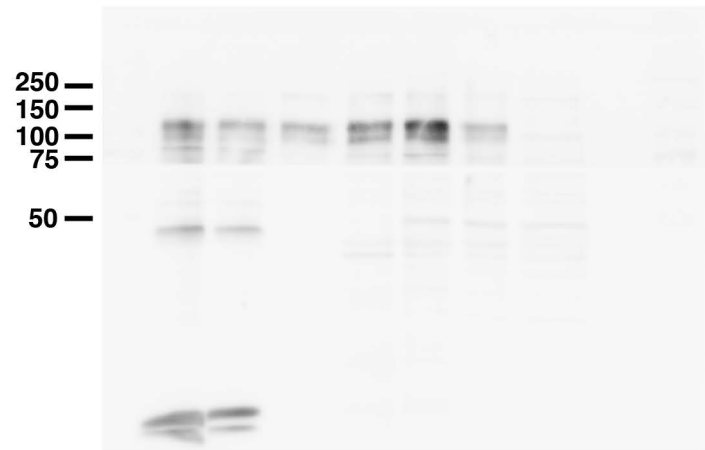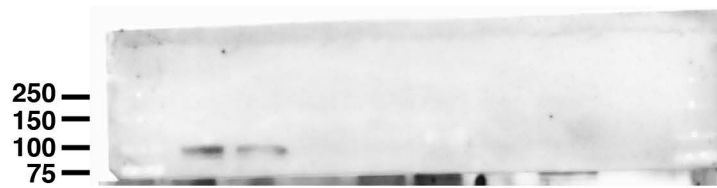

**C**

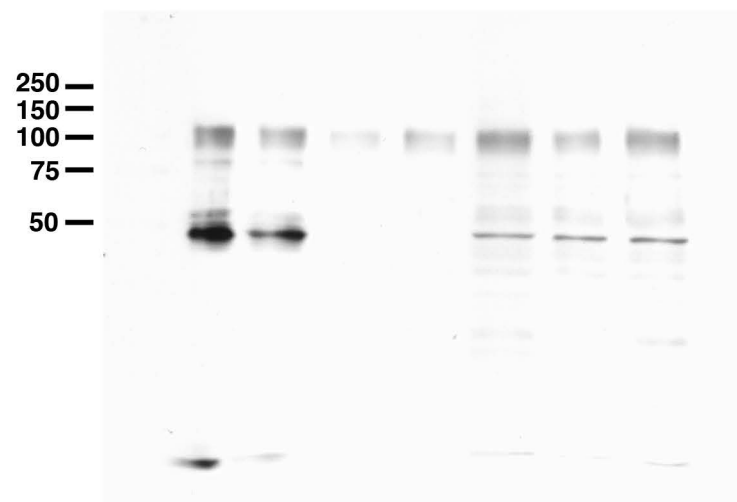

Supplement: emboj2012235s4.pdf [file emboj2012235s4.pdf]

**Figure 2.**

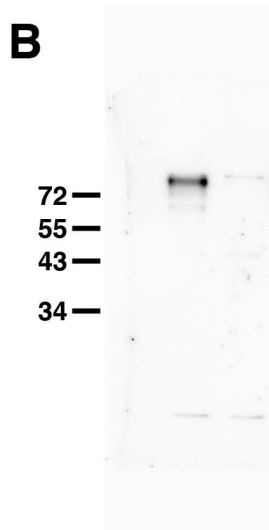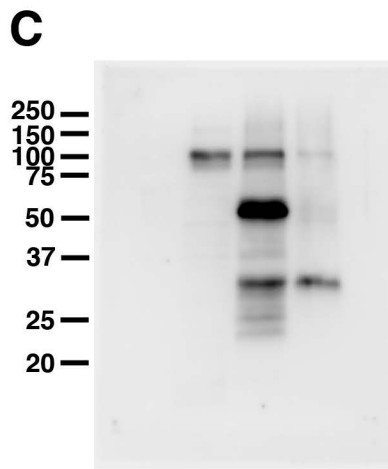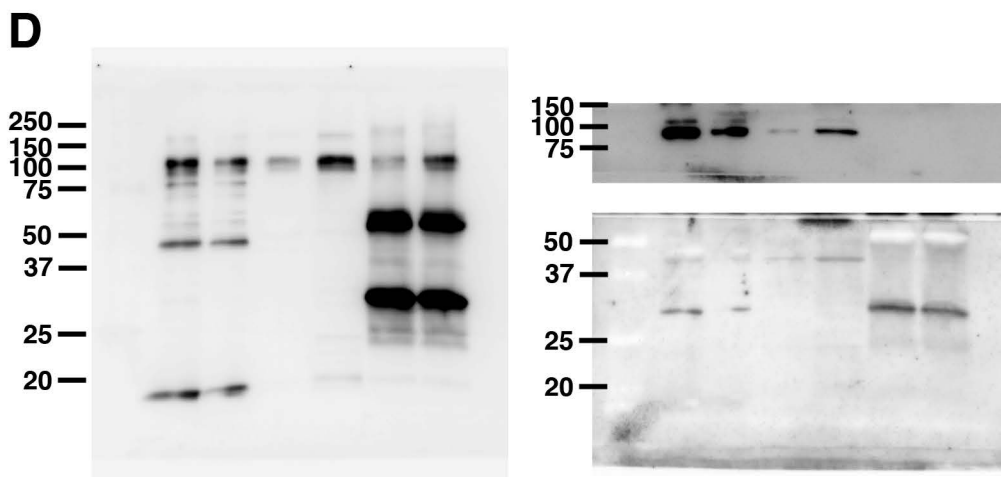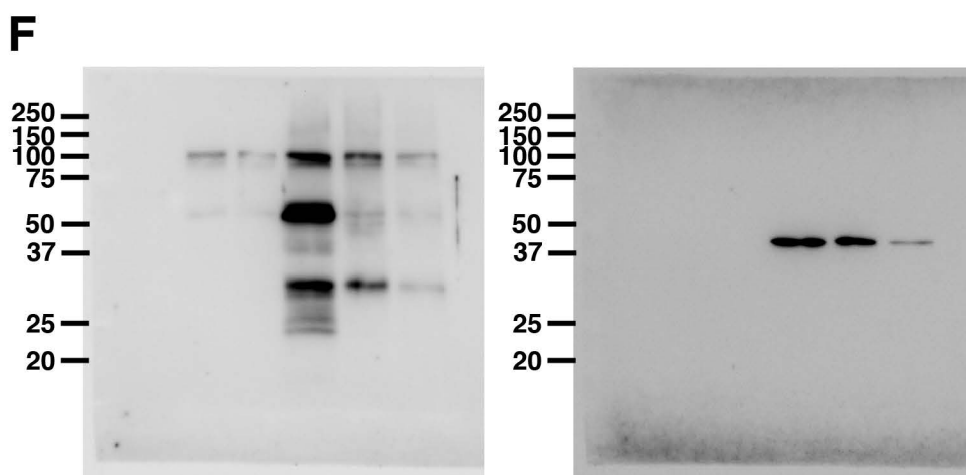

Supplement: emboj2012235s5.pdf [file emboj2012235s5.pdf]

**Figure 3.**

**C**

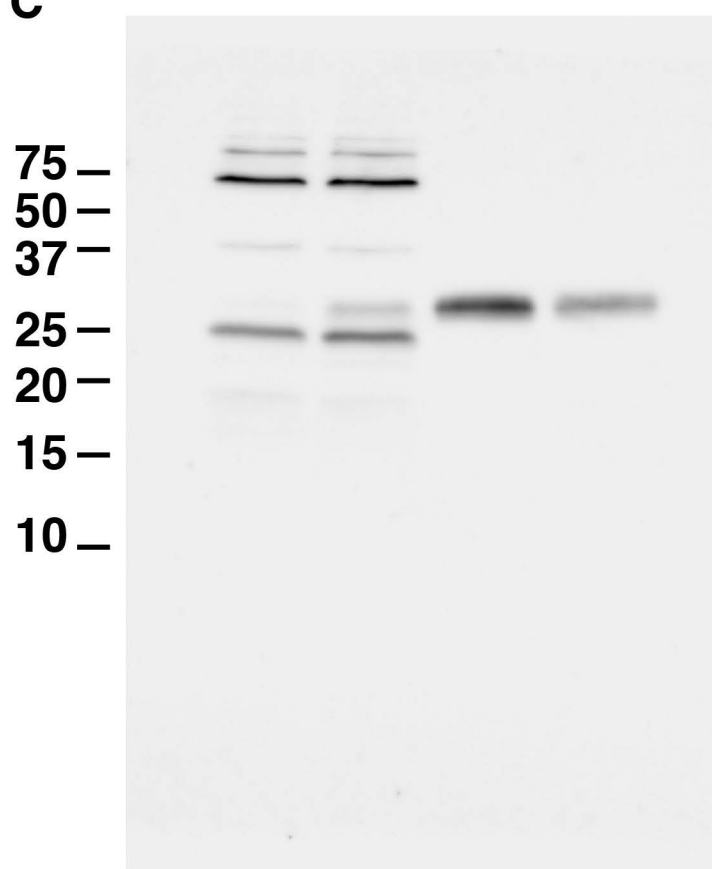

Supplement: emboj2012235s6.pdf [file emboj2012235s6.pdf]

**Figure 7.**

**B**

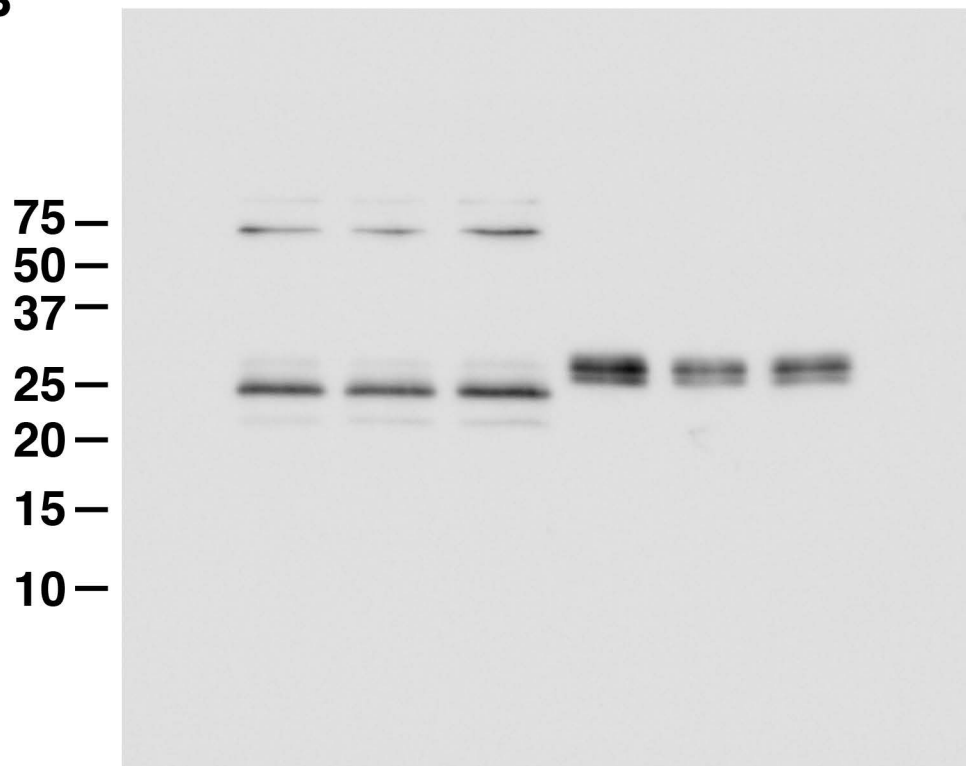

**D**

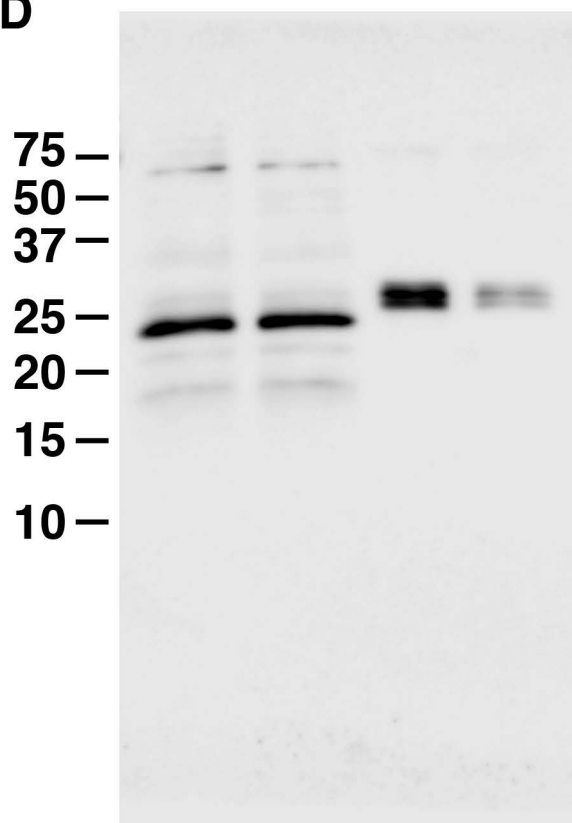

Supplement: emboj2012235s7.pdf [file emboj2012235s7.pdf]

**Figure 8.**

**A**

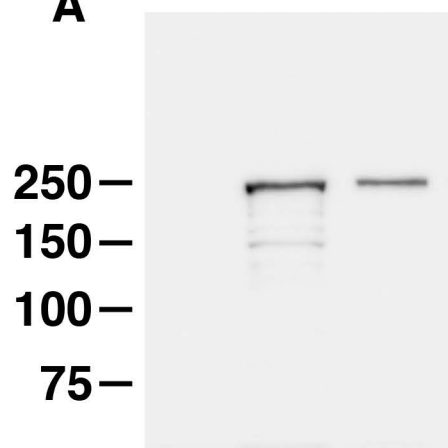

**B**

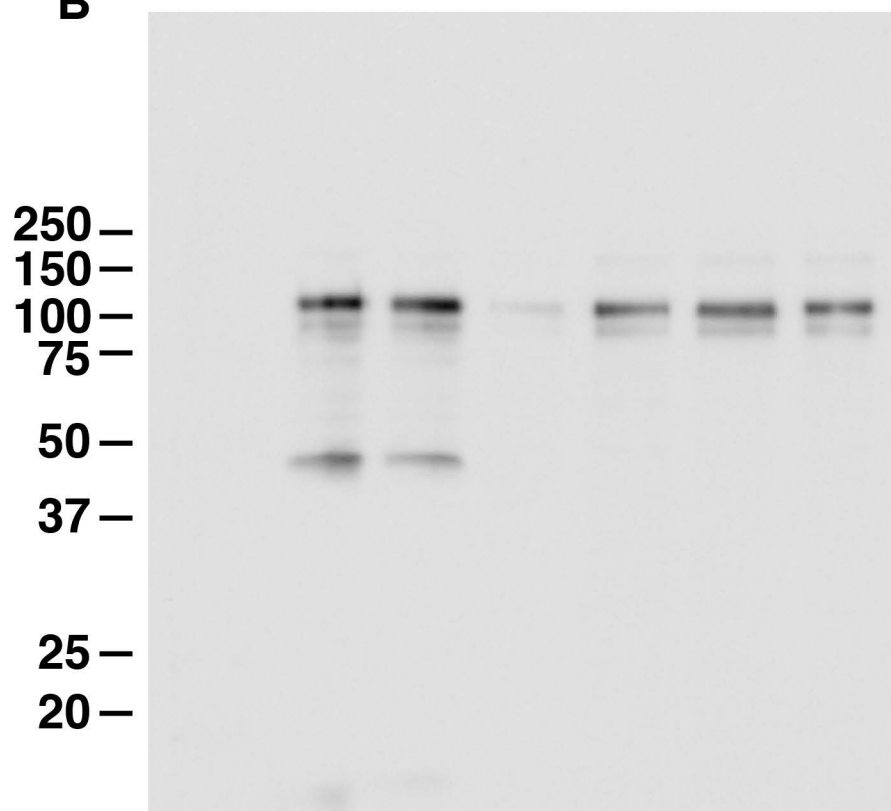

Supplement: emboj2012235s8.pdf [file emboj2012235s8.pdf]

## Supplementary figure 5.

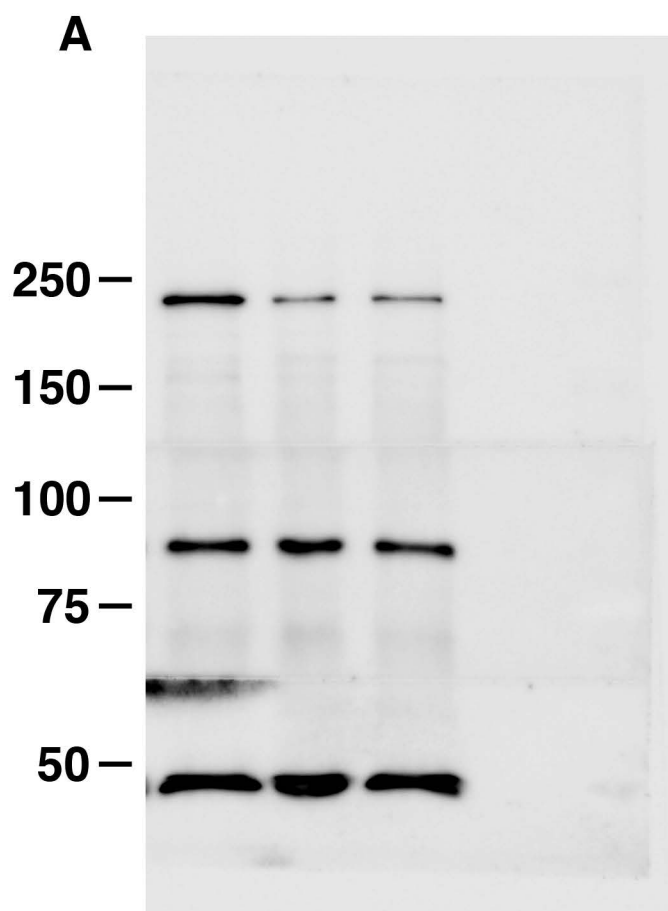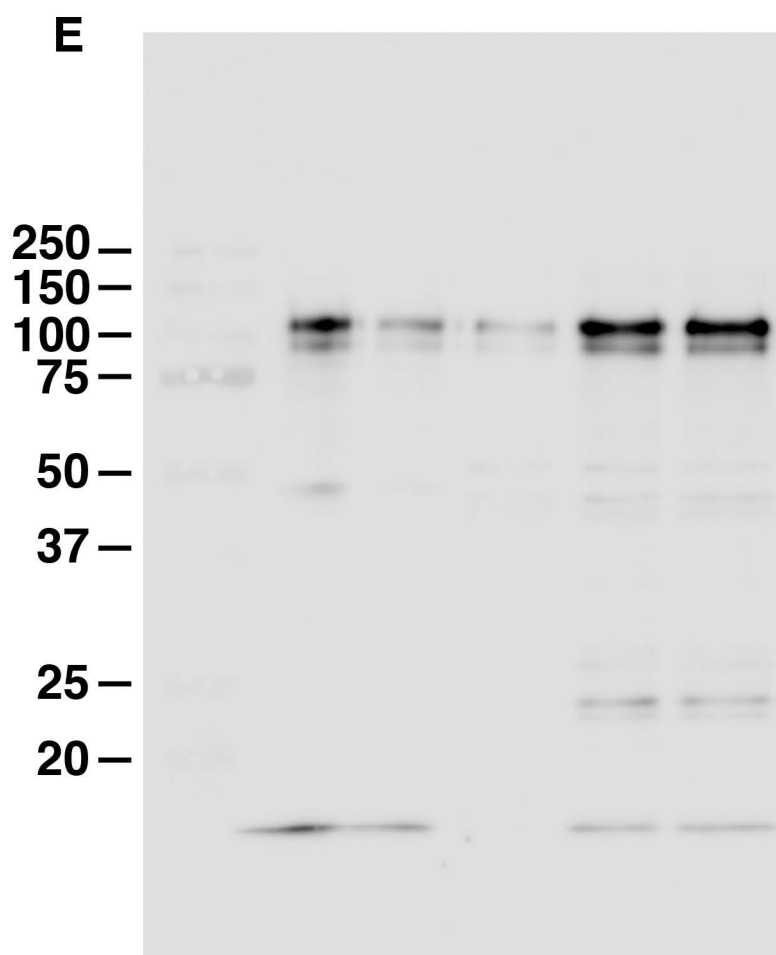

Supplement: emboj2012235s9.pdf [file emboj2012235s9.pdf]
